# Supplementary material for: An iron-based metal–organic framework for selective CO2 adsorption and as an efficient anode material for lithium-ion batteries
Source: Royal Society of Chemistry journal article supplement (doi:10.1039/d3nj01378b), 2023-01-01
Supplement: d3nj01378b1.pdf [file d3nj01378b1.pdf]

Supporting Information for

**An iron-based metal-organic framework for selective CO<sub>2</sub>  
adsorption and efficient anode material for lithium-ion battery**

Y B. N. Tran,<sup>ab</sup> Phuong T. K. Nguyen,<sup>\*ab</sup> and Tuan Loi Nguyen<sup>ab</sup>

<sup>a</sup>Institute of Fundamental and Applied Sciences, Duy Tan University, Ho Chi Minh City 700000,  
Viet Nam

<sup>b</sup>Faculty of Natural Sciences, Duy Tan University, Da Nang, 550000, Viet Nam.

\*To whom correspondence should be addressed: Email, [nguyentkieuphuong1@duytan.edu.vn](mailto:nguyentkieuphuong1@duytan.edu.vn).

## Table of Contents

|                   |                                                                                 |           |
|-------------------|---------------------------------------------------------------------------------|-----------|
| <b>Section S1</b> | Materials and Analytical Techniques                                             | S3 – S4   |
| <b>Section S2</b> | Characterizations, Powder X-Ray Diffraction and Structural Refinement of Fe-CPB | S5 – S12  |
| <b>Section S3</b> | Gas Adsorption Studies of Fe-CPB                                                | S13 – S14 |
| <b>Section S4</b> | Electrochemical Studies of Fe-CPB.                                              | S15 – S17 |
| <b>Section S5</b> | Post-Cycling Characterizations of Fe-CPB                                        | S18 – S20 |
| <b>Section S6</b> | References                                                                      | S21       |

## Section S1: Materials and Analytical Techniques

### Chemicals and Materials

Copper(I) iodide (CuI,  $\geq 99.5\%$ ), 1,8-diazabicycloundec-7-ene (DBU,  $\geq 99.0\%$ ), sodium hydroxide (NaOH, reagent grade,  $\geq 98\%$ ), trimesic acid ( $\text{H}_3\text{BTC}$ , 95%), iron (III) acetylacetonate ( $\text{Fe}(\text{acac})_3$ ,  $\geq 99.9\%$ ), iron (III) nitrate nonahydrate ( $\text{Fe}(\text{NO}_3)_3 \cdot 9\text{H}_2\text{O}$ ,  $\geq 99.9\%$ ), poly(vinylidene fluoride) (PVDF, average Mw  $\sim 534,000$  by GPC), lithium hexafluorophosphate solution ( $\text{LiPF}_6$ , 1 M, in ethylene carbonate (EC) : diethyl carbonate (DEC) = 1:1, v/v), Celgard 2400, and hydrochloric acid (HCl, 1 M) were obtained from Sigma-Aldrich. Methyl-4-iodobenzoate (98%), bis(triphenyl-phosphine)palladium(II) chloride ( $\text{PdCl}_2(\text{PPh}_3)_2$ , 98%), diethylamine (DEA, 99.5%), trimethylsilylacetylene (98%), dicobalt octacarbonyl ( $\text{Co}_2(\text{CO})_8$ , 95%), anhydrous 1,4-dioxane (99.8%), anhydrous tetrahydrofuran (THF, 99.85%), anhydrous methanol (MeOH, 99.5%), and *N,N*-dimethylformamide (DMF, 99.8%) were purchased from Acros Organics. Anhydrous dichloromethane (DCM), ammonium chloride (99.998%), anhydrous sodium sulfate, *N*-methyl-2-pyrrolidone (NMP, 99.5%), and glacial acetic acid ( $\text{CH}_3\text{COOH}$ ,  $\geq 99.85\%$ ) were obtained from Merck Chemical Co. Carbon black Super P (99+) was obtained from Alfa Aesar. Copper foil (thickness 12  $\mu\text{m}$ ,  $>99.9\%$ ) and lithium foil (thickness 0.1 mm,  $>99.9\%$ ) were purchased from Tob New Energy Company. Diethylamine and deionized water (ultrapure, 17.8  $\text{M}\Omega \cdot \text{cm}$  resistivity, obtained from a Barnstead Easypure II system) were degassed with a stream of  $\text{N}_2$  for 5 min prior to addition into the Sonogashira coupling reactions. All other chemicals were used without further purification unless otherwise noted.

**Synthesis of Fe-MIL-100.** Fe-MIL-100 was synthesized following previous works with slight modifications.<sup>S1,S2</sup>  $\text{Fe}(\text{NO}_3)_3 \cdot 9\text{H}_2\text{O}$  (3.26 g, 9.2 mmol) and trimesic acid (1.13 g, 5.4 mmol) were dissolved in 40 mL water. The reactant mixture was stirred at room temperature for 1h and accordingly loaded in a Teflon-lined pressure vessel. The reactor vessel was heated up to 160°C for 12h to produce a light orange solid. The solid was filtrated, washed with deionized water ( $3 \times 10$  mL), and treated in hot deionized water (10 mL,  $\sim 80^\circ\text{C}$ ) for 3h to eliminate the residuals iron salt and  $\text{H}_3\text{BTC}$  linker. The MOF solid was then dried at room temperature for 18 h, followed by heating at 80 °C under vacuum for an additional 24 h.

### Analytical Techniques

Optical microscope images were collected on Nikon SMZ1000 Zoom Stereomicroscope. Elemental microanalyses (EA) were performed on a LECO CHNS-932 Analyzer. Thermal gravimetric analysis (TGA) was performed on a TA Q500 thermal analysis system with the sample held in a platinum pan in a continuous airflow. Field-emission Scanning Electron Microscope (FE-SEM) was performed on an ultralow voltage imaging with Hitachi's S-4800 FE-SEM operating at an accelerating voltage of 1 kV. Energy dispersive X-ray analyzer (EDX) was conducted on a Horiba H-7593.

**Section S2:** Characterizations, Powder X-Ray Diffraction and Structural Refinement of Fe-CPB

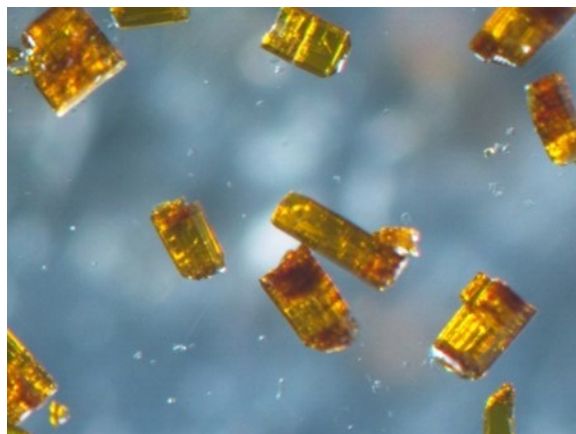

**Figure S1.** Optical microscope image of Fe-CPB.

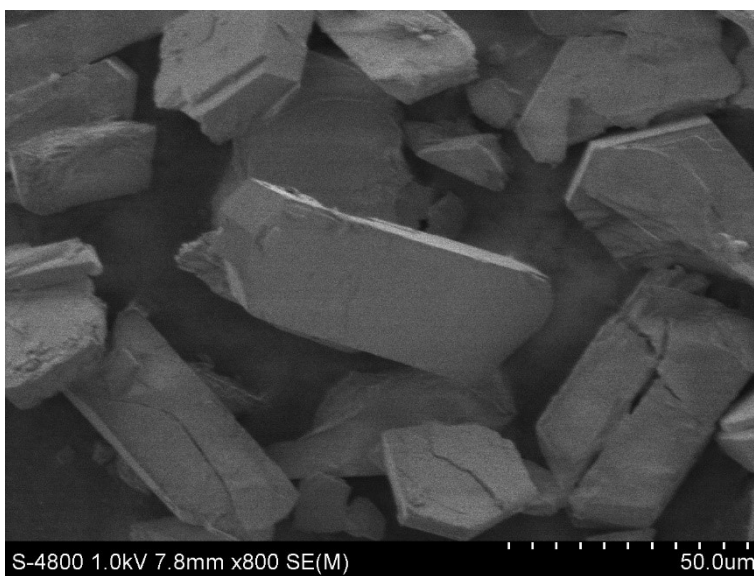

**Figure S2.** SEM image of Fe-CPB.

**Table S1.** Unit cell parameters and fractional atomic coordinates for the refined crystal Fe-CPB.

| Empirical formula, Space group |           | $C_{64}H_{58}Fe_4N_4O_{20}$ , $P2/c$                                                                                                              |          |         |                |
|--------------------------------|-----------|---------------------------------------------------------------------------------------------------------------------------------------------------|----------|---------|----------------|
| Refined unit cell              |           | $a = 28.1854 \text{ \AA}$ , $b = 15.6499 \text{ \AA}$ , $c = 13.5063 \text{ \AA}$ , $\alpha = \gamma = 90.0000^\circ$ , $\beta = 98.8648^\circ$ . |          |         |                |
| Pawley refinement              |           | $R_{wp} = 3.70\%$ , $R_{wp}$ (w/o background) = 4.48%, $R_p = 1.82\%$                                                                             |          |         |                |
| Atom label                     | Atom type | $x$                                                                                                                                               | $y$      | $z$     | Site Occupancy |
| Fe3                            | Fe        | 0.32852                                                                                                                                           | -0.03371 | 0.5913  | 1              |
| Fe4                            | Fe        | 0.34647                                                                                                                                           | -0.06143 | 0.84129 | 1              |
| Fe1                            | Fe        | 0.17428                                                                                                                                           | 0.45889  | 0.8682  | 1              |
| Fe2                            | Fe        | 0.17131                                                                                                                                           | 0.47138  | 0.61962 | 1              |
| O19                            | O         | 0.32                                                                                                                                              | 0.05124  | 0.47024 | 1              |
| O13                            | O         | 0.3556                                                                                                                                            | 0.90351  | 0.71015 | 1              |
| O2                             | O         | 0.15449                                                                                                                                           | 1.41183  | 0.73616 | 1              |
| C50                            | C         | 0.00155                                                                                                                                           | 0.56292  | 0.93208 | 1              |
| H50A                           | H         | -0.01507                                                                                                                                          | 0.58593  | 0.87052 | 1              |
| H50B                           | H         | 0.02142                                                                                                                                           | 0.60646  | 0.96737 | 1              |
| H50C                           | H         | -0.02134                                                                                                                                          | 0.54347  | 0.97283 | 1              |
| O9                             | O         | 0.19178                                                                                                                                           | 0.546    | 0.98781 | 1              |
| O11                            | O         | 0.24509                                                                                                                                           | 0.4617   | 0.8364  | 1              |
| O12                            | O         | 0.23646                                                                                                                                           | 0.51931  | 0.68359 | 1              |
| O15                            | O         | 0.37514                                                                                                                                           | 0.05827  | 0.8302  | 1              |
| O3                             | O         | 0.25854                                                                                                                                           | 1.00681  | 0.61804 | 1              |
| O16                            | O         | 0.36794                                                                                                                                           | 0.06515  | 0.66448 | 1              |
| O5                             | O         | 0.13265                                                                                                                                           | 0.58154  | 0.62683 | 1              |
| O14                            | O         | 0.4013                                                                                                                                            | 0.92085  | 0.59456 | 1              |
| O4                             | O         | 0.27666                                                                                                                                           | 1.00503  | 0.78309 | 1              |
| O1                             | O         | 0.10712                                                                                                                                           | 1.41798  | 0.59246 | 1              |
| O8                             | O         | 0.19285                                                                                                                                           | 0.35426  | 0.96261 | 1              |
| O17                            | O         | 0.41667                                                                                                                                           | -0.09579 | 0.91548 | 1              |

|      |   |          |          |         |   |
|------|---|----------|----------|---------|---|
| O6   | O | 0.14231  | 0.56443  | 0.79071 | 1 |
| O18  | O | 0.3074   | -0.13647 | 0.49577 | 1 |
| O20  | O | 0.3162   | 0.17216  | 0.39055 | 1 |
| O10  | O | 0.20969  | 0.6623   | 1.07273 | 1 |
| O7   | O | 0.10329  | 0.43836  | 0.90446 | 1 |
| C32  | C | 0.46747  | 0.4856   | 0.76893 | 1 |
| C47  | C | 0.38178  | 0.09308  | 0.75058 | 1 |
| C45  | C | 0.40976  | 0.17594  | 0.75763 | 1 |
| C29  | C | 0.41404  | 0.4858   | 0.76548 | 1 |
| C33  | C | 0.49226  | 0.56297  | 0.77008 | 1 |
| C9   | C | 0.04689  | 0.99521  | 0.75295 | 1 |
| C5   | C | 0.04724  | 1.15544  | 0.74479 | 1 |
| C40  | C | 0.39045  | 0.87949  | 0.66576 | 1 |
| C26  | C | 0.31477  | 0.48921  | 0.76346 | 1 |
| C41  | C | 0.49248  | 0.40759  | 0.77287 | 1 |
| C42  | C | 0.46441  | 0.32599  | 0.7681  | 1 |
| C34  | C | 0.46534  | 0.64543  | 0.74888 | 1 |
| C8   | C | 0.02332  | 1.07272  | 0.76326 | 1 |
| C37  | C | 0.41585  | 0.7978   | 0.69698 | 1 |
| C21  | C | 0.09992  | 0.68589  | 0.72529 | 1 |
| C18  | C | 0.04907  | 0.83546  | 0.75047 | 1 |
| C16  | C | 0.2478   | 1.00476  | 0.7039  | 1 |
| N1   | N | 0.47569  | -0.08756 | 1.04811 | 1 |
| C17  | C | 0.02346  | 0.9177   | 0.76368 | 1 |
| C36  | C | 0.41195  | 0.75735  | 0.78635 | 1 |
| H36  | H | 0.39266  | 0.78077  | 0.82943 | 1 |
| C49  | C | 0.00693  | 0.41042  | 0.8828  | 1 |
| H49A | H | 0.02419  | 0.37952  | 0.8383  | 1 |
| H49B | H | -0.02517 | 0.4214   | 0.85    | 1 |
| H49C | H | 0.00585  | 0.37708  | 0.9421  | 1 |
| C25  | C | 0.26116  | 0.48957  | 0.76125 | 1 |

|      |   |         |         |         |   |
|------|---|---------|---------|---------|---|
| C13  | C | 0.19534 | 1.00245 | 0.7143  | 1 |
| C35  | C | 0.43668 | 0.682   | 0.8121  | 1 |
| H35  | H | 0.43401 | 0.6556  | 0.87273 | 1 |
| C10  | C | 0.09838 | 0.99616 | 0.73676 | 1 |
| C2   | C | 0.09361 | 1.30536 | 0.70214 | 1 |
| C7   | C | 0.10364 | 1.26839 | 0.79566 | 1 |
| H7   | H | 0.12587 | 1.29373 | 0.84501 | 1 |
| C24  | C | 0.12696 | 0.6043  | 0.7127  | 1 |
| C27  | C | 0.34564 | 0.4781  | 0.85202 | 1 |
| H27  | H | 0.33337 | 0.47191 | 0.91169 | 1 |
| C43  | C | 0.44144 | 0.29571 | 0.67737 | 1 |
| H43  | H | 0.44397 | 0.32575 | 0.61903 | 1 |
| C01I | C | 0.30704 | 0.12962 | 0.46268 | 1 |
| C31  | C | 0.33357 | 0.49877 | 0.67595 | 1 |
| H31  | H | 0.31313 | 0.50633 | 0.61561 | 1 |
| C30  | C | 0.38323 | 0.49733 | 0.67723 | 1 |
| H30  | H | 0.39557 | 0.50412 | 0.61775 | 1 |
| C6   | C | 0.08079 | 1.1939  | 0.81651 | 1 |
| H6   | H | 0.08808 | 1.16924 | 0.87963 | 1 |
| C39  | C | 0.46799 | 0.68547 | 0.65837 | 1 |
| H39  | H | 0.4865  | 0.6613  | 0.61436 | 1 |
| C22  | C | 0.08031 | 0.73327 | 0.64314 | 1 |
| H22  | H | 0.08378 | 0.71514 | 0.57911 | 1 |
| C12  | C | 0.1819  | 0.98251 | 0.80542 | 1 |
| H12  | H | 0.20538 | 0.97158 | 0.86028 | 1 |
| C23  | C | 0.05543 | 0.80793 | 0.65573 | 1 |
| H23  | H | 0.0428  | 0.83999 | 0.59989 | 1 |
| C44  | C | 0.41456 | 0.22096 | 0.67187 | 1 |
| H44  | H | 0.39969 | 0.20109 | 0.60991 | 1 |
| C46  | C | 0.43173 | 0.20677 | 0.84857 | 1 |
| H46  | H | 0.42829 | 0.17766 | 0.90712 | 1 |



|      |   |         |          |         |   |
|------|---|---------|----------|---------|---|
| C1   | C | 0.11913 | 1.38313  | 0.6753  | 1 |
| C28  | C | 0.395   | 0.47609  | 0.85278 | 1 |
| H28  | H | 0.41543 | 0.46807  | 0.91307 | 1 |
| C56  | C | 0.43386 | -0.06405 | 0.99684 | 1 |
| H56  | H | 0.41655 | -0.02146 | 1.02343 | 1 |
| C62  | C | 0.45902 | 0.28105  | 0.85385 | 1 |
| H62  | H | 0.47385 | 0.30082  | 0.91594 | 1 |
| C14  | C | 0.15997 | 1.01896  | 0.6342  | 1 |
| H14  | H | 0.16846 | 1.03196  | 0.57206 | 1 |
| C38  | C | 0.44369 | 0.76031  | 0.63273 | 1 |
| H38  | H | 0.44594 | 0.78612  | 0.57163 | 1 |
| C11  | C | 0.13389 | 0.97849  | 0.81634 | 1 |
| H11  | H | 0.12549 | 0.96363  | 0.87799 | 1 |
| N2   | N | 0.27313 | -0.2012  | 0.3554  | 1 |
| C19  | C | 0.06856 | 0.78748  | 0.8319  | 1 |
| H19  | H | 0.06469 | 0.80491  | 0.89601 | 1 |
| C15  | C | 0.11178 | 1.01638  | 0.64512 | 1 |
| H15  | H | 0.08834 | 1.02824  | 0.59056 | 1 |
| C20  | C | 0.09404 | 0.71304  | 0.81942 | 1 |
| H20  | H | 0.10719 | 0.68141  | 0.87521 | 1 |
| C54  | C | 0.21125 | 0.62058  | 0.99628 | 1 |
| C3   | C | 0.05961 | 1.26764  | 0.63083 | 1 |
| H3   | H | 0.05219 | 1.29224  | 0.56761 | 1 |
| N3   | N | 0.23068 | 0.29315  | 1.10271 | 1 |
| C4   | C | 0.03666 | 1.19405  | 0.65251 | 1 |
| H4   | H | 0.01357 | 1.16992  | 0.60397 | 1 |
| C59  | C | 0.27771 | -0.14024 | 0.42081 | 1 |
| H59  | H | 0.25618 | -0.09497 | 0.40921 | 1 |
| C028 | C | 0.27988 | 0.16845  | 0.53881 | 1 |
| H02A | H | 0.25065 | 0.13727  | 0.53993 | 1 |
| H02B | H | 0.27244 | 0.22697  | 0.52143 | 1 |

|      |   |         |          |         |   |
|------|---|---------|----------|---------|---|
| H02C | H | 0.29922 | 0.16608  | 0.60383 | 1 |
| C51  | C | 0.22451 | 0.35266  | 1.03596 | 1 |
| H51  | H | 0.2459  | 0.39824  | 1.04412 | 1 |
| C58  | C | 0.49308 | -0.05313 | 1.14721 | 1 |
| H58A | H | 0.4716  | -0.00928 | 1.16289 | 1 |
| H58B | H | 0.52453 | -0.02931 | 1.14794 | 1 |
| H58C | H | 0.49458 | -0.09798 | 1.19602 | 1 |
| C57  | C | 0.50412 | -0.15239 | 1.00846 | 1 |
| H57A | H | 0.50445 | -0.20332 | 1.04823 | 1 |
| H57B | H | 0.53637 | -0.13202 | 1.0104  | 1 |
| H57C | H | 0.49041 | -0.16493 | 0.94049 | 1 |
| C55  | C | 0.23604 | 0.65621  | 0.91488 | 1 |
| H55A | H | 0.26865 | 0.63633  | 0.92375 | 1 |
| H55B | H | 0.23572 | 0.71748  | 0.91779 | 1 |
| H55C | H | 0.21965 | 0.63762  | 0.85088 | 1 |
| C48  | C | 0.07763 | 0.49115  | 0.92252 | 1 |
| H48  | H | 0.09242 | 0.54078  | 0.94985 | 1 |
| C61  | C | 0.23356 | -0.20305 | 0.27107 | 1 |
| H61A | H | 0.21165 | -0.15715 | 0.27789 | 1 |
| H61B | H | 0.21688 | -0.2566  | 0.27071 | 1 |
| H61C | H | 0.2461  | -0.19659 | 0.20934 | 1 |
| C52  | C | 0.19807 | 0.22282  | 1.09649 | 1 |
| H52A | H | 0.17221 | 0.23225  | 1.04239 | 1 |
| H52B | H | 0.18535 | 0.21794  | 1.15825 | 1 |
| H52C | H | 0.21461 | 0.17116  | 1.08464 | 1 |
| C60  | C | 0.30621 | -0.26833 | 0.36421 | 1 |
| H60A | H | 0.33343 | -0.254   | 0.41335 | 1 |
| H60B | H | 0.31668 | -0.27791 | 0.30067 | 1 |
| H60C | H | 0.29141 | -0.31932 | 0.38449 | 1 |
| C53  | C | 0.27123 | 0.29356  | 1.18437 | 1 |

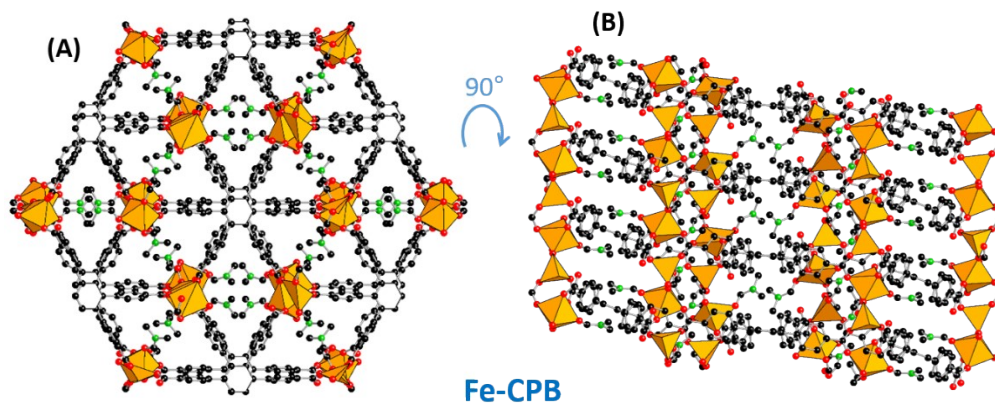

**Figure S3.** Crystal structure of as-synthesized Fe-CPB with the presence of coordinated DMF. Color code: Fe, orange polyhedra; C, black; O, red; N, green. All H atoms are omitted for clarity.

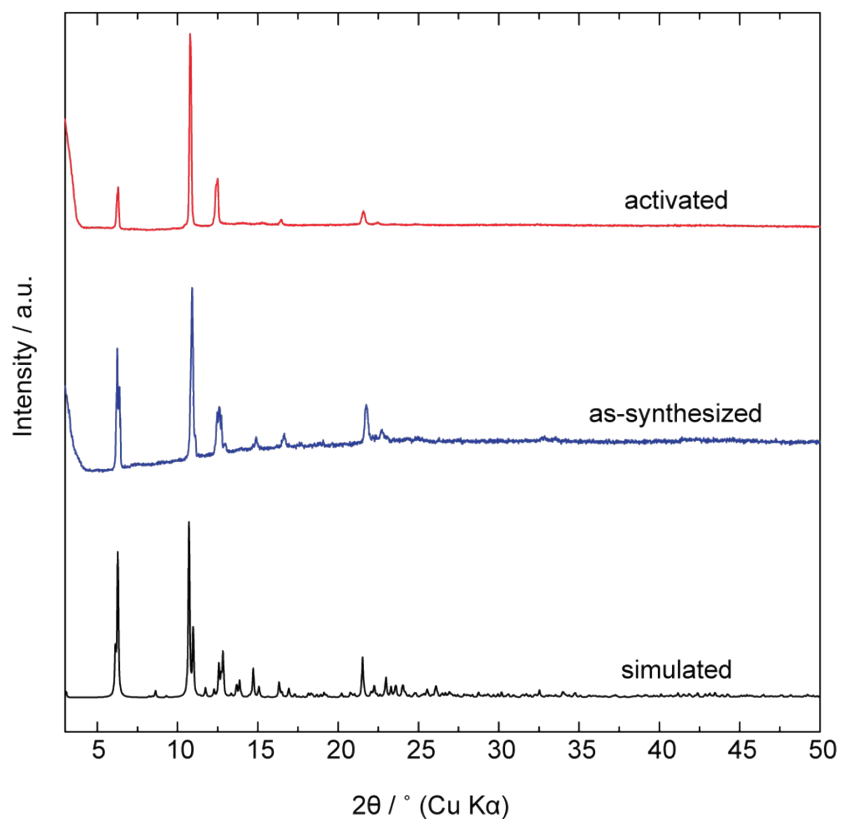

**Figure S4.** Comparison of the simulated (black) PXRD pattern from the single crystal data with the experimental as-synthesized (blue) and activated (red) PXRD patterns of Fe-CPB.

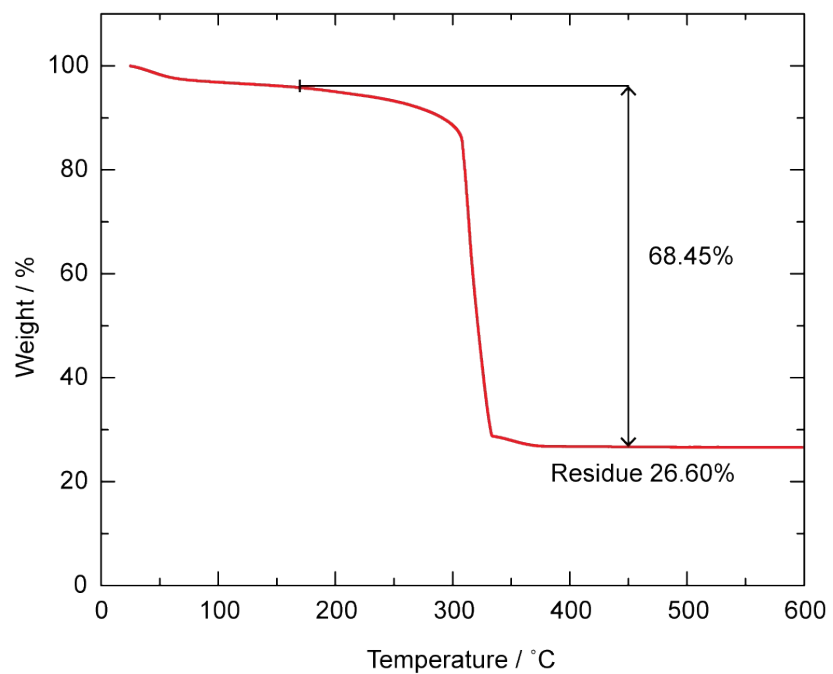

**Figure S5.** TGA traces of activated Fe-CPB at a heating rate of 5 °C min<sup>-1</sup> under air flow.

### Section S3: Gas Adsorption Studies of Fe-CPB

#### Gas selectivity calculated by Henry's Law

Virial-type equation was employed for estimation of Henry's constant:

$$\ln P = \ln N + \frac{1}{T} \sum_{i=0}^m a_i N^i + \sum_{i=0}^n b_i N^i$$

Where  $P$  is pressure,  $N$  is the adsorbed amount,  $T$  is temperature,  $a_i$  and  $b_i$  are virial coefficient, and  $m$  and  $n$  are the number of virial coefficients required for adequate fitting of the isotherms. As a result, Henry's constant ( $K_H$ ) at the temperature  $T$  can be calculated:

$$K_H = \exp(-b_0) \cdot \exp(-a_0/T)$$

The Henry's Law selectivity for gas component  $i$  over  $j$  is calculated:

$$S_{ij} = K_{H_i}/K_{H_j}$$

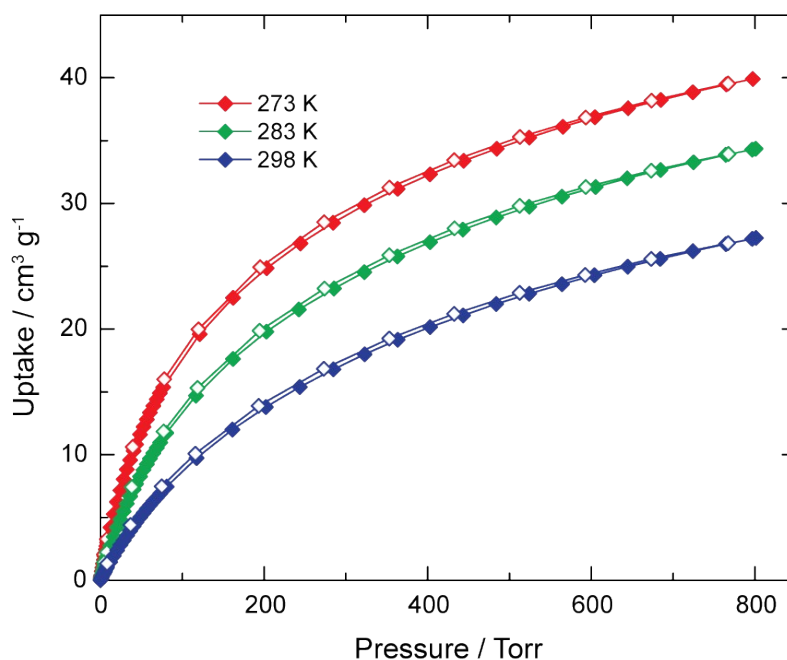

**Figure S6.** CO<sub>2</sub> isotherms for Fe-CPB at 273 (red), 283 (green), and 298 K (blue). Filled and open symbols represent adsorption and desorption branches, respectively. The connecting curves are guides for the eye.

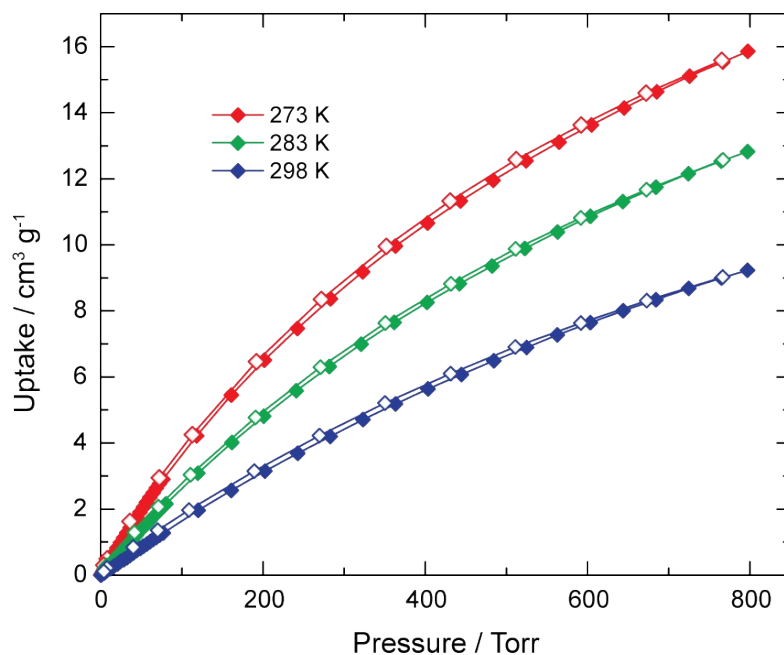

**Figure S7.** CH<sub>4</sub> isotherms for Fe-CPB at 273 (red), 283 (green), and 298 K (blue). Filled and open symbols represent adsorption and desorption branches, respectively. The connecting curves are guides for the eye.

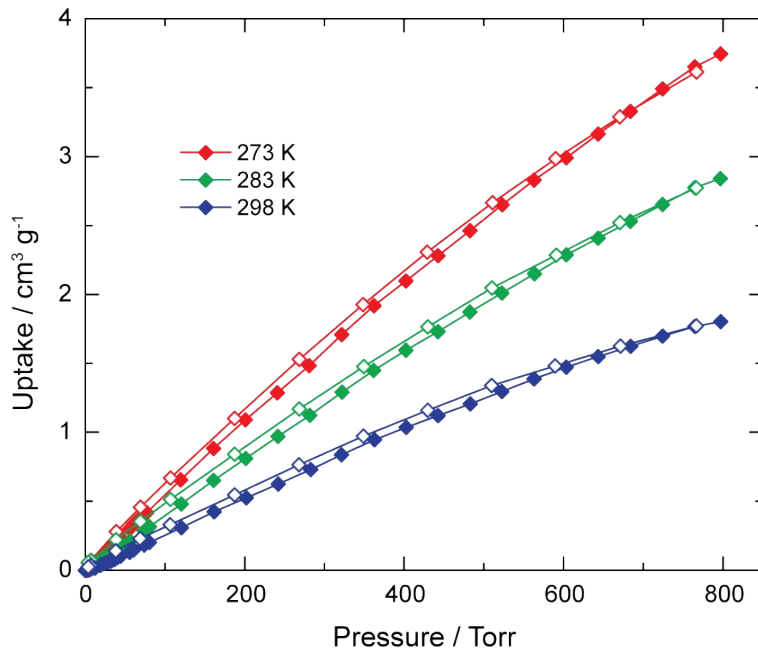

**Figure S8.** N<sub>2</sub> isotherms for Fe-CPB at 273 (red), 283 (green), and 298 K (blue). Filled and open symbols represent adsorption and desorption branches, respectively. The connecting curves are guides for the eye.

## Section S4: Electrochemical Studies of Fe-CPB

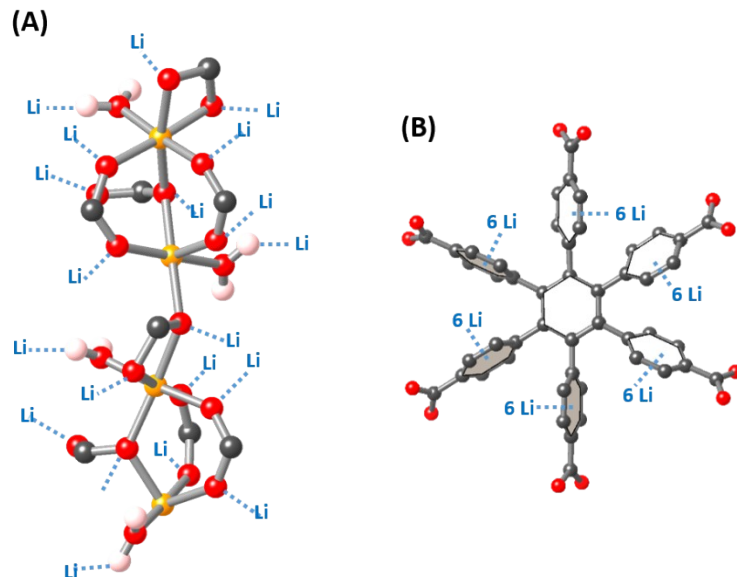

**Figure S9.** Possible sites for Li<sup>+</sup> insertion at (A) the iron-oxo cluster and (B) the organic CPB linker of Fe-CPB.

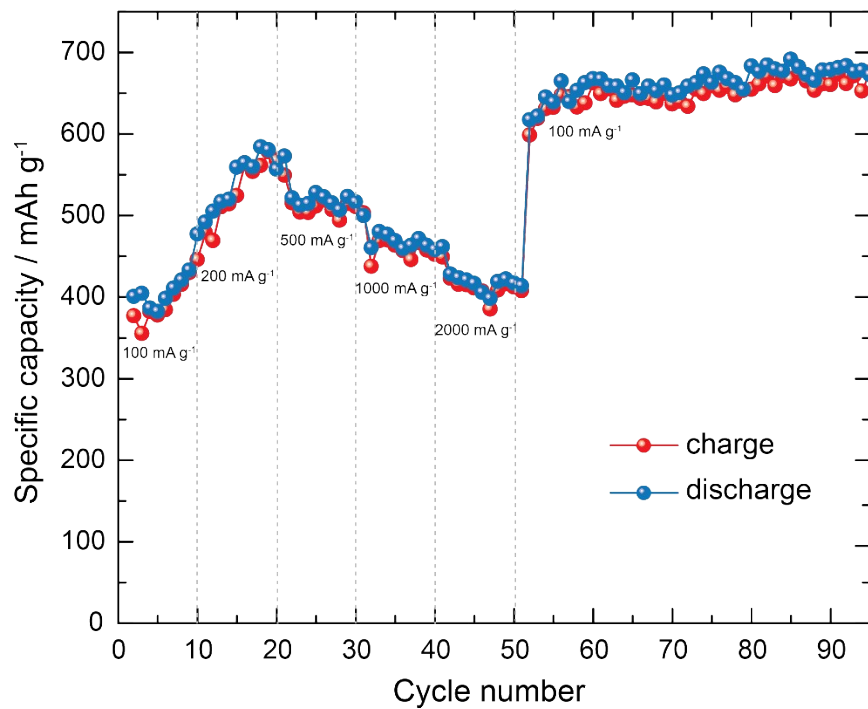

**Figure S10.** Rate capability of Fe-CPB at different current densities

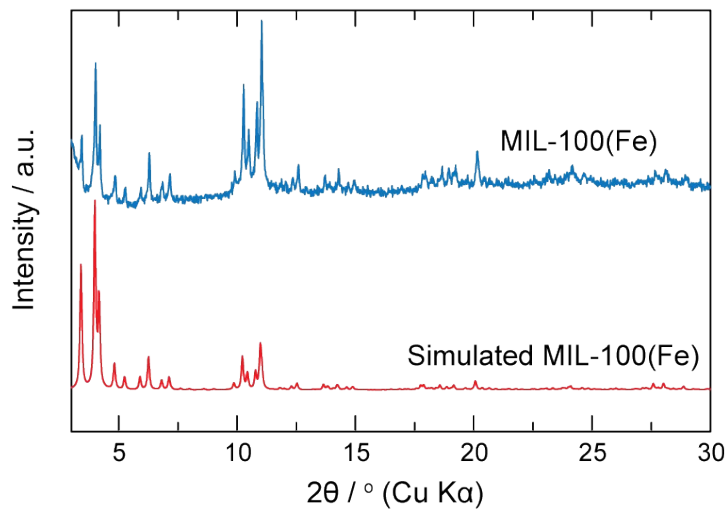

**Figure S11.** Comparison of the simulated (black) PXRD pattern from the reported structure data with the experimental activated (blue) PXRD of Fe-MIL-100.

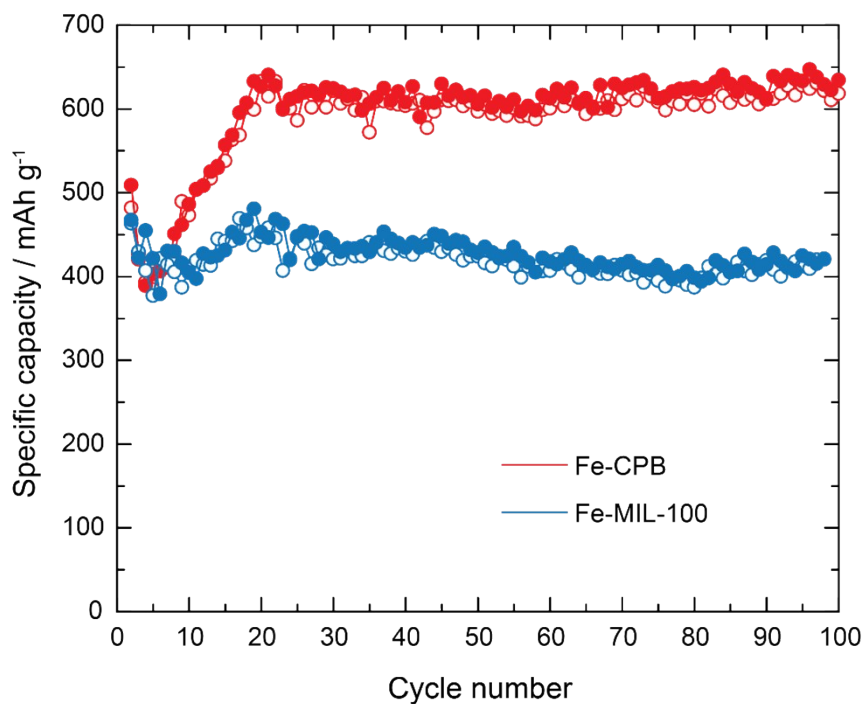

**Figure S12.** The cycling performance of Fe-CPB and Fe-MIL-100 at the current density of 100 mA g<sup>-1</sup>. Filled and open symbols represent discharge and charge processes, respectively.



**Table S2.** Comparison of pristine MOFs as anodic materials for lithium-ion batteries.

| # | MOF (wt%)                                               | Capacity/<br>mAh g <sup>-1</sup> | Current<br>density/<br>mA g <sup>-1</sup> | Cycle<br>number | Capacity/mAh<br>g <sup>-1</sup> @ Highest<br>current/mA g <sup>-1</sup> | Ref.         |
|---|---------------------------------------------------------|----------------------------------|-------------------------------------------|-----------------|-------------------------------------------------------------------------|--------------|
| 1 | Fe-CPB<br>(60 wt%)                                      | 634                              | 100                                       | 100             | 416@ 2000                                                               | This<br>work |
| 2 | Fe-MIL-88B<br>(60 wt%)                                  | 744.5                            | 60                                        | 400             | ~200@2 000                                                              | [S3]         |
| 3 | Mn-BTC<br>(70 wt%)                                      | 600                              | 103                                       | 100             | 250@ 2061                                                               | [S4]         |
| 4 | Pb-BTC<br>(80%)                                         | 625                              | 100                                       | 150             | 190@ 2000                                                               | [S5]         |
| 5 | Co-L1<br>(80 wt%)                                       | 617                              | 100                                       | 200             | 346@ 1000                                                               | [S6]         |
| 6 | Li-MOF<br>(60 wt%)                                      | 458                              | 100                                       | 80              | -                                                                       | [S7]         |
| 7 | Zn <sub>3</sub> (HCOO) <sub>6</sub><br>(70 wt%)         | 560                              | 60                                        | 60              | 265@ 3000                                                               | [S8]         |
| 8 | Zn(Im) <sub>1.5</sub> (abIm) <sub>0.5</sub><br>(70 wt%) | ~190                             | 100                                       | 200             | 75@ 400                                                                 | [S9]         |

## Section S5: Post-Cycling Characterizations of Fe-CPB

The ethylene carbonate solvent reduction reaction proceeds as follows:

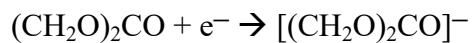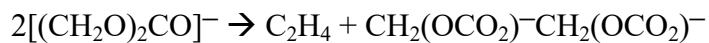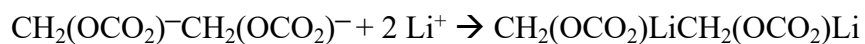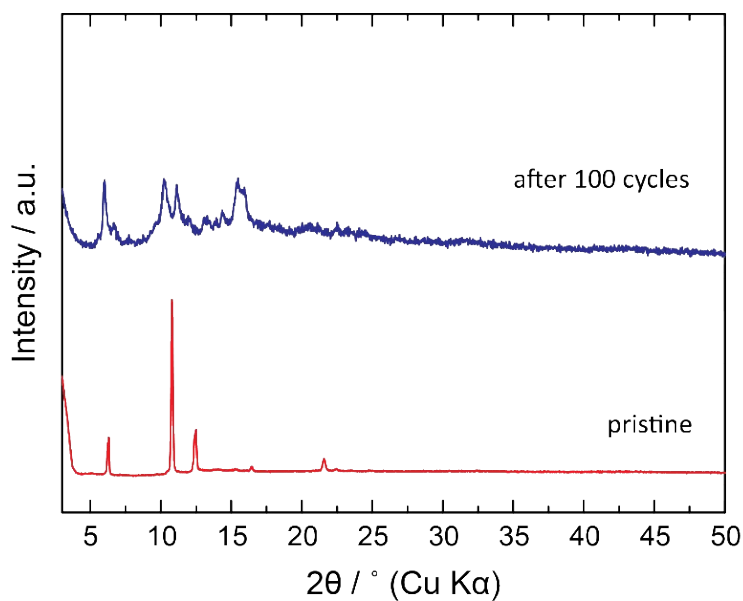

**Figure S13.** PXRD of pristine Fe-CPB and cycled Fe-CPB electrode after 100 cycles.

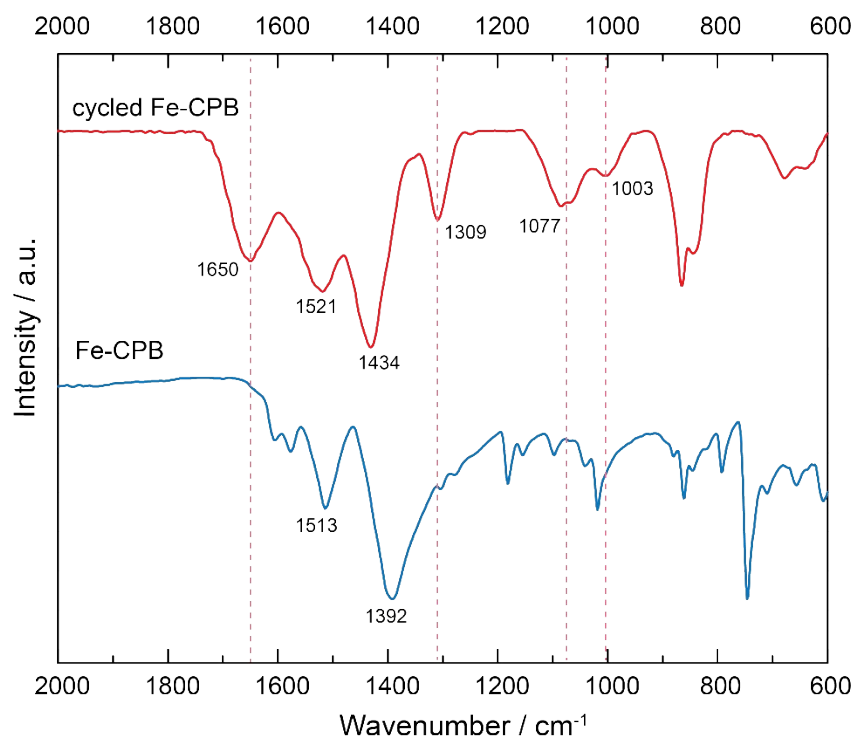

**Figure S14.** FTIR of pristine Fe-CPB and cycled Fe-CPB electrode after 100 cycles.

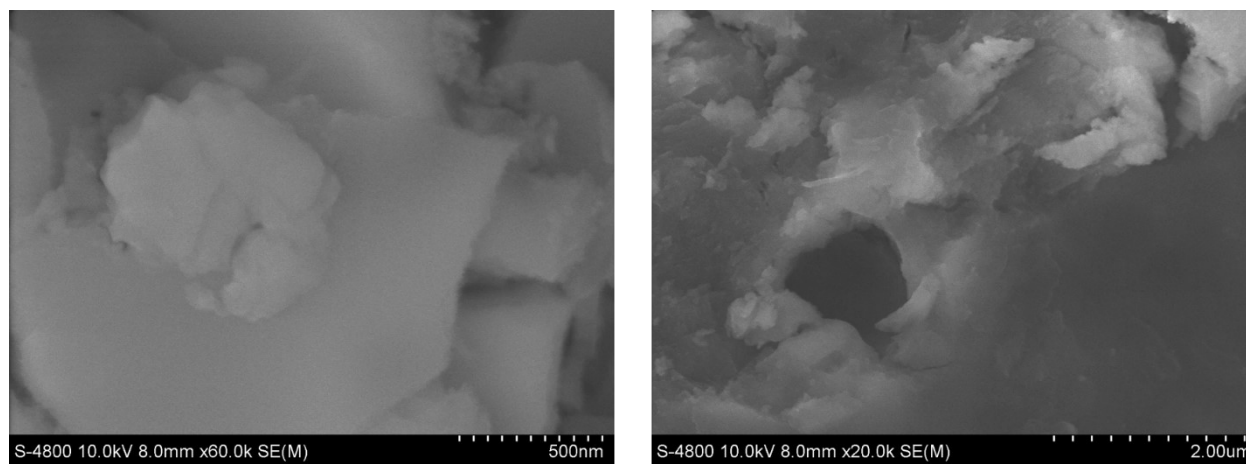

**Figure S15.** SEM images of cycled Fe-CPB electrode after 100 cycles.

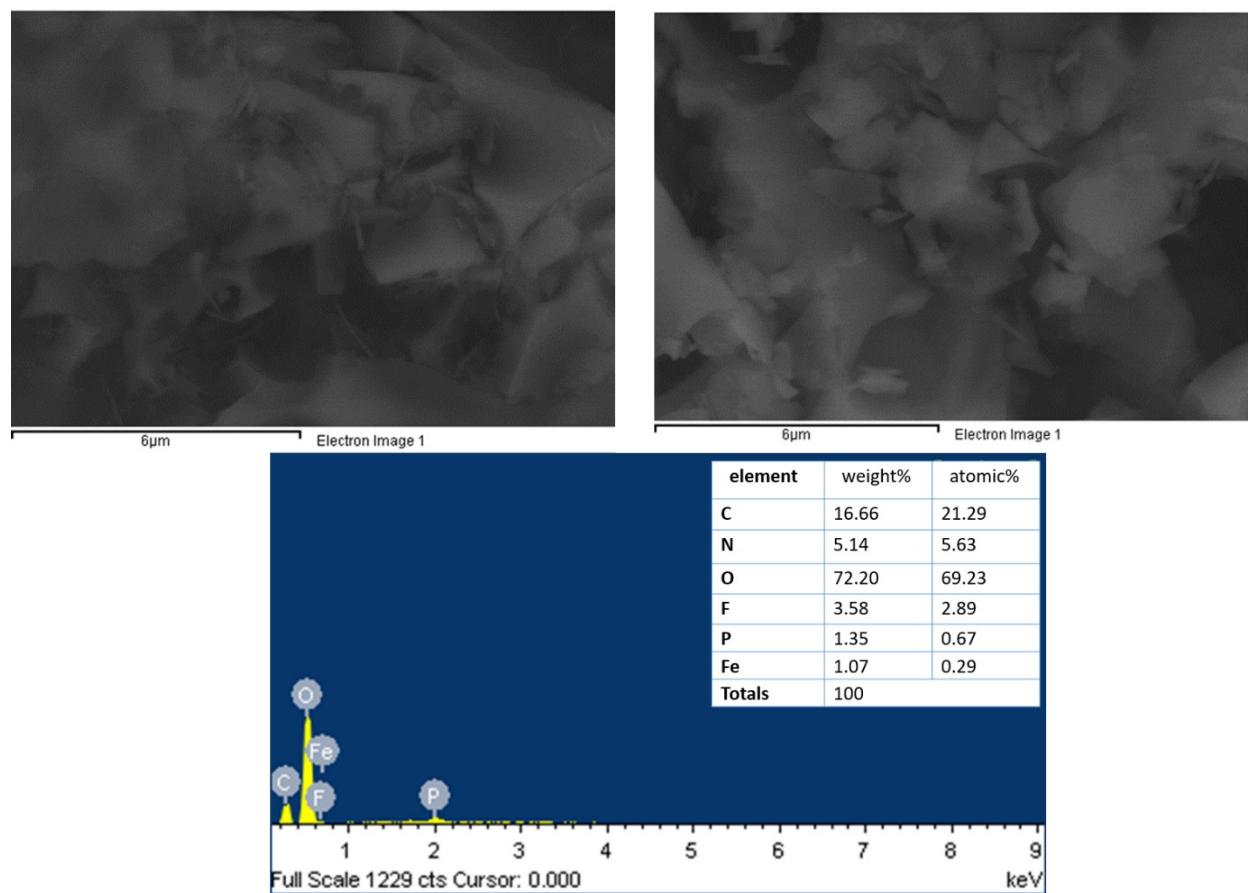

**Figure S16.** SEM-EDX analysis of recycled Fe-CPB electrode after 100 cycles

## Section S6: References

- [S1] P. Horcajada, S. Surblé, C. Serre, D.-Y. Hong, Y.-K. Seo, J.-S. Chang, J.-M. Grenèche, I. Margiolaki and G. Férey, *Chem. Commun.*, 2007, 2820-2822.
- [S2] Y.-K. Seo, J. W. Yoon, J. S. Lee, U. H. Lee, Y. K. Hwang, C.-H. Jun, P. Horcajada, C. Serre and J.-S. Chang, *Microporous Mesoporous Mater.*, 2012, **157**, 137-145.
- [S3] L. Shen, H. Song and C. Wang, *Electrochim. Acta*, 2017, **235**, 595-603.
- [S4] S. Maiti, A. Pramanik, U. Manju and S. Mahanty, *ACS Appl. Mater. Interfaces*, 2015, **7**, 16357-16363.
- [S5] F. Baskoro, H. Q. Wong, K. B. Labasan, C.-W. Cho, C.-W. Pao, P.-Y. Yang, C.-C. Chang, C.-I. Chen, C.-C. Chueh, W. Nie, H. Tsai and H.-J. Yen, *Energy Fuels*, 2021, **35**, 9669-9682.
- [S6] T. Gong, X. Lou, E.-Q. Gao and B. Hu, *ACS Appl. Mater. Interfaces*, 2017, **9**, 21839-21847.
- [S7] X. Han, F. Yi, T. Sun and J. Sun, *Electrochem. Commun.*, 2012, **25**, 136-139.
- [S8] K. Saravanan, M. Nagarathinam, P. Balaya and J. J. Vittal, *J. Mater. Chem.*, 2010, **20**, 8329-8335.
- [S9] Y. Lin, Q. Zhang, C. Zhao, H. Li, C. Kong, C. Shen and L. Chen, *Chem. Commun.*, 2015, **51**, 697-699.
